# Supplementary material for: In vitro and in vivo assessment of nanostructured porous biphasic calcium phosphate ceramics for promoting osteogenesis in an osteoporotic environment
Source: Royal Society of Chemistry journal article supplement (doi:10.1039/c8ra00768c), 2018-01-01
Supplement: c8ra00768c1.pdf [file c8ra00768c1.pdf]

## Supplementary Information

# *In Vivo* Assessment of Nanostructured Porous Biphasic Calcium Phosphate Ceramics for Promoting Osteogenesis in Osteoporotic Environment

Kun Zhang<sup>1</sup>, Jieyu Zhang<sup>1</sup>, Kelei Chen<sup>2</sup>, Xuefeng Hu<sup>1\*</sup>, Yunbing Wang<sup>1</sup>, Xiao  
Yang<sup>1\*</sup>, Xingdong Zhang<sup>1</sup>, Yujiang Fan<sup>1</sup>

<sup>1</sup>National Engineering Research Center for Biomaterials, Sichuan University, 29  
Wangjiang Road, Chengdu, 610064, China

<sup>2</sup>Zenminde Biotech Co., Ltd, B2, CAS, No 9 4th Section of South Remin Road,  
Chengdu, China

---

\* To whom correspondence should be addressed.

Tel: 86-28-85417654

Fax: 86-28-85410246

Email: [huxuefeng@scu.edu.cn](mailto:huxuefeng@scu.edu.cn), [xiaoyang114@scu.edu.cn](mailto:xiaoyang114@scu.edu.cn)

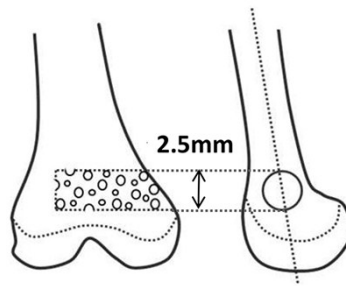

Fig. S1. Schematic illustration of the femur metaphyseal defect created on an osteoporotic rat.
